# Supplementary material
Source: Royal Society of Chemistry journal article supplement (doi:10.1039/d6eb00032k)
Supplement: d6eb00032k1.pdf [file d6eb00032k1.pdf]

## Supporting Information

### Conversion-Alloying Electrodes for Lithium-ion Batteries: Entropy and Nano-Level Heterogeneity Effects

*Sajid Alvi, Andrea Fazi, Daniel Weber, Daniel Hedman, Kriti Choudhary, Olof Bäcké, Farid Akhtar, Jean-Noel Chotard, Mattias Thuvander, and Patrik Johansson\**

**Table S1.** Elemental masses (g) used to synthesize the metal tellurides.

| Comp./<br>Elements | Sn     | Sb     | Bi     | Ge     | Zn     | Cu     | Te     |
|--------------------|--------|--------|--------|--------|--------|--------|--------|
| ST                 |        | 1.9440 |        |        |        |        | 3.0559 |
| GT                 |        |        |        | 1.8138 |        |        | 3.1861 |
| SSBT               | 0.7118 | 0.7301 | 1.2531 |        |        |        | 2.3047 |
| SSGT               | 0.8529 | 0.8748 |        | 0.5219 |        |        | 2.7503 |
| SSBT-Ge            | 0.5748 | 0.5896 | 1.0120 | 0.3517 |        |        | 2.4716 |
| SSBT-Zn            | 0.5789 | 0.5938 | 1.0191 |        | 0.3188 |        | 2.4891 |
| SSBT-GeCu          | 0.4850 | 0.4975 | 0.8539 | 0.2968 |        | 0.2596 | 2.6069 |

**Table S2.** Calculations of theoretical capacities and the resulting current densities used for the C/5 rate cycling for the synthesized metal tellurides.

| Comp./<br>Elements | Sn         | Sb         | Bi         | Ge          | Zn        | Cu    | Te      | Total<br>Capacity<br>mAh g <sup>-1</sup> | mA g <sup>-1</sup> for<br>C/5 |
|--------------------|------------|------------|------------|-------------|-----------|-------|---------|------------------------------------------|-------------------------------|
| ST                 |            | 0.4*660    |            |             |           |       | 0.6*420 | 516                                      | 103                           |
| GT                 |            |            |            | 0.5*1623    |           |       | 0.5*420 | 1021.5                                   | 202                           |
| SSBT               | 0.1667*990 | 0.1667*660 | 0.1667*385 |             |           |       | 0.5*420 | 549.2                                    | 100                           |
| SSGT               | 0.1667*990 | 0.1667*660 |            | 0.1667*1623 |           |       | 0.5*420 | 755.5                                    | 126                           |
| SSBT-Ge            | 0.125*990  | 0.125*660  | 0.125*385  | 0.125*1623  |           |       | 0.5*420 | 667.3                                    | 107                           |
| SSBT-Zn            | 0.125*990  | 0.125*660  | 0.125*385  |             | 0.125*385 |       | 0.5*420 | 515.6                                    | 103                           |
| SSBT-<br>GeCu      | 0.1*990    | 0.1*660    | 0.1*385    | 0.1*1623    |           | 0.1*0 | 0.5*420 | 575.8                                    | 100                           |

**Table S3.** Lattice parameters from Pawley's refinements for the synthesized metal tellurides.

| Comp.         | $\Delta S$ | $\epsilon_o$ (%) | GoF  | P-1                                                                                                              | SG-1  | Lattice parameters (Å) |             | P-2                   | SG-2    | Lattice Parameters |           |            |
|---------------|------------|------------------|------|------------------------------------------------------------------------------------------------------------------|-------|------------------------|-------------|-----------------------|---------|--------------------|-----------|------------|
|               |            |                  |      |                                                                                                                  |       | a = b                  | c           |                       |         | a                  | b         | c          |
| GT            | 0.6 R      | 0.376 (9)        | 1.06 | GeTe                                                                                                             | R3mH  | 4.161 (8)              | 10.508 (17) |                       |         |                    |           |            |
| ST            | 0.6 R      | 0.0387 (4)       | 1.07 | Sb <sub>2</sub> Te <sub>3</sub>                                                                                  | R-3mH | 4.262 (3)              | 30.368 (6)  |                       |         |                    |           |            |
| SSBT          | 1.16 R     | 0.512 (11)       | 1.16 | Sn <sub>1/6</sub> Sb <sub>1/6</sub> Bi <sub>1/6</sub> Te <sub>1/2</sub>                                          | R-3mH | 4.375 (6)              | 29.079 (9)  |                       |         |                    |           |            |
| SSBT (SPS)    | 1.16 R     | 0.194 (2)        | 1.33 | Sn <sub>1/6</sub> Sb <sub>1/6</sub> Bi <sub>1/6</sub> Te <sub>1/2</sub>                                          | R-3mH | 4.369 (3)              | 29.571 (29) |                       |         |                    |           |            |
| SSGT          | 1.16 R     | 0.393 (3)        | 1.14 | Sn <sub>1/6</sub> Sb <sub>1/6</sub> Bi <sub>1/6</sub> Te <sub>1/2</sub>                                          | R3mH  | 4.325 (7)              | 10.657 (3)  |                       |         |                    |           |            |
| SSBT-Ge       | 1.38 R     | 0.50 (2)         | 1.01 | Sn <sub>1/8</sub> Sb <sub>1/8</sub> Bi <sub>1/8</sub> Ge <sub>1/8</sub> Te <sub>1/2</sub>                        | R-3mH | 4.590 (2)              | 28.452 (19) | GeO <sub>2</sub>      | P42/mnm | 4.359 (2)          | 4.359 (2) | 2.891 (6)  |
| SSBT-Ge (SPS) | 1.38 R     | 0.214 (1)        | 1.3  | Sn <sub>1/8</sub> Sb <sub>1/8</sub> Bi <sub>1/8</sub> Ge <sub>1/8</sub> Te <sub>1/2</sub>                        | R-3mH | 4.613 (5)              | 28.543 (6)  | GeO <sub>2</sub>      | P42/mnm | 4.377 (7)          | 4.377 (7) | 2.9075 (9) |
| SSBT-Zn       | 1.38 R     | 2.93             | 1.55 | Sn <sub>1/8</sub> Sb <sub>1/8</sub> Bi <sub>1/8</sub> Zn <sub>1/8</sub> Te <sub>1/2</sub>                        | R-3mH | 4.625 (11)             | 28.573 (16) | ZnTe                  | F4-3m   | 6.160 (3)          | 6.160 (3) | 6.160 (3)  |
| SSBT-GeCu     | 1.61 R     | 0.31 (5)         | 1.05 | Sn <sub>1/12</sub> Sb <sub>1/12</sub> Bi <sub>1/12</sub> Ge <sub>1/12</sub> Cu <sub>1/12</sub> Te <sub>1/2</sub> | R-3mH | 4.316 (8)              | 28.300 (17) | Cu <sub>1.75</sub> Te | P-3m1   | 8.336              | 8.336     | 7.196      |

Symbols:  $\epsilon_o$  = microstrain; Comp. = compositions; GoF = Goodness of fit; P = Phase; SG = Space group

**Table S4.** Elemental compositions (at. %) of synthesized metal tellurides from EDX point analysis.

| Comp./<br>Elements | Sn       | Sb       | Bi       | Ge     | Zn     | Cu     | Te       |
|--------------------|----------|----------|----------|--------|--------|--------|----------|
| ST                 |          | 41 ± 0.3 |          |        |        |        | 59 ± 0.3 |
| GT                 |          |          |          | 65 ± 3 |        |        | 35 ± 3   |
| SSBT               | 17 ± 0.3 | 17 ± 0.3 | 16 ± 2   |        |        |        | 50 ± 1   |
| SSGT               | 17 ± 0.5 | 17 ± 0.7 |          | 18 ± 3 |        |        | 48 ± 2   |
| SSBT-Ge            | 12 ± 0.2 | 11 ± 0.2 | 15 ± 0.3 | 19 ± 1 |        |        | 43 ± 0.4 |
| SSBT-Zn            | 13 ± 0.2 | 12 ± 0.2 | 13 ± 0.2 |        | 16 ± 1 |        | 47 ± 0.5 |
| SSBT-GeCu          | 10 ± 0.3 | 10 ± 0.3 | 9 ± 0.3  | 11 ± 2 |        | 13 ± 2 | 47 ± 1   |

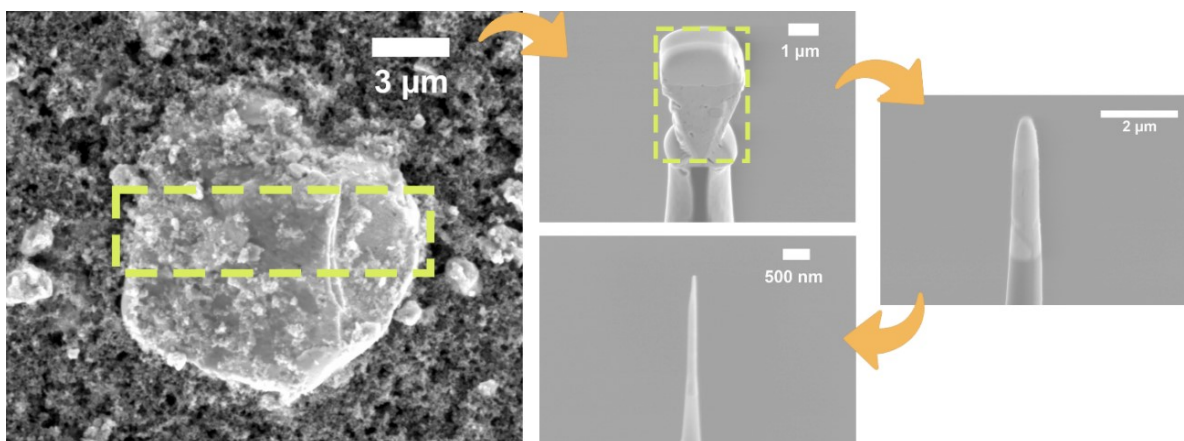

**Fig. S1.** FIB lift-out procedure from an active material (metal telluride) embedded in the coated electrode.

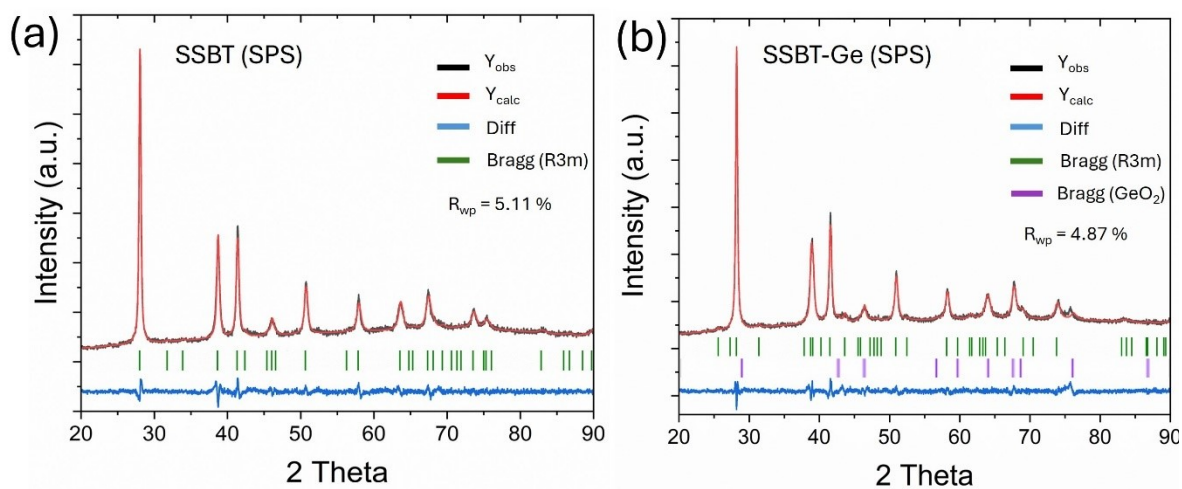

**Fig. S2.** X-ray diffractograms of ball milled: a) SSBT and b) SSBT-Ge, both after SPS.

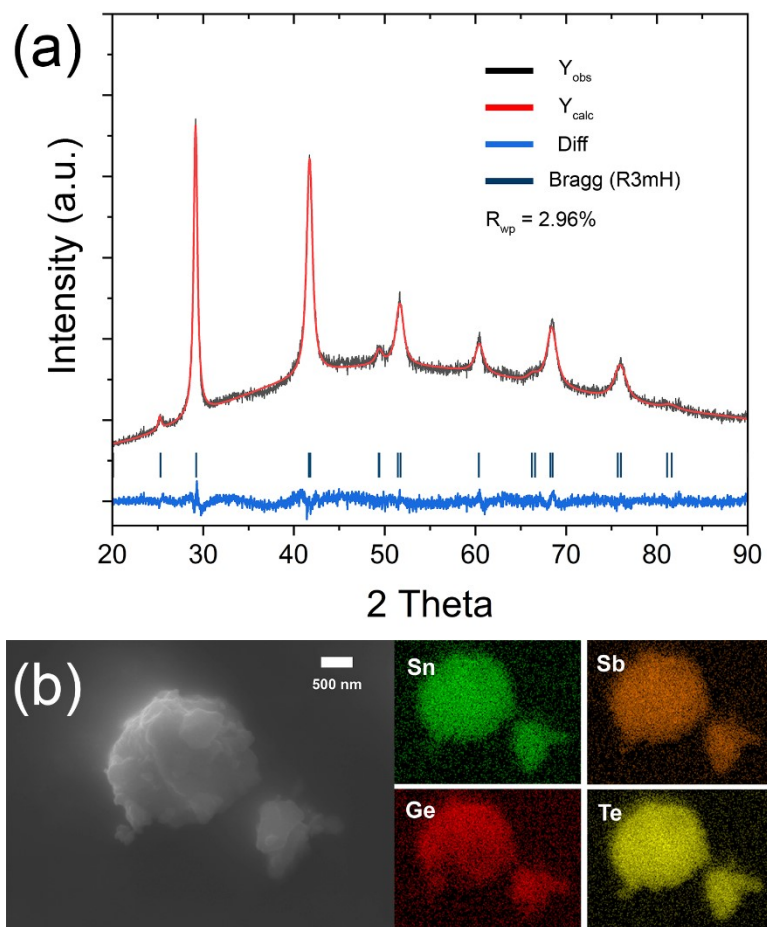

**Fig. S3.** a) X-ray diffractogram and b) SEM-EDS mapping of SSGT.

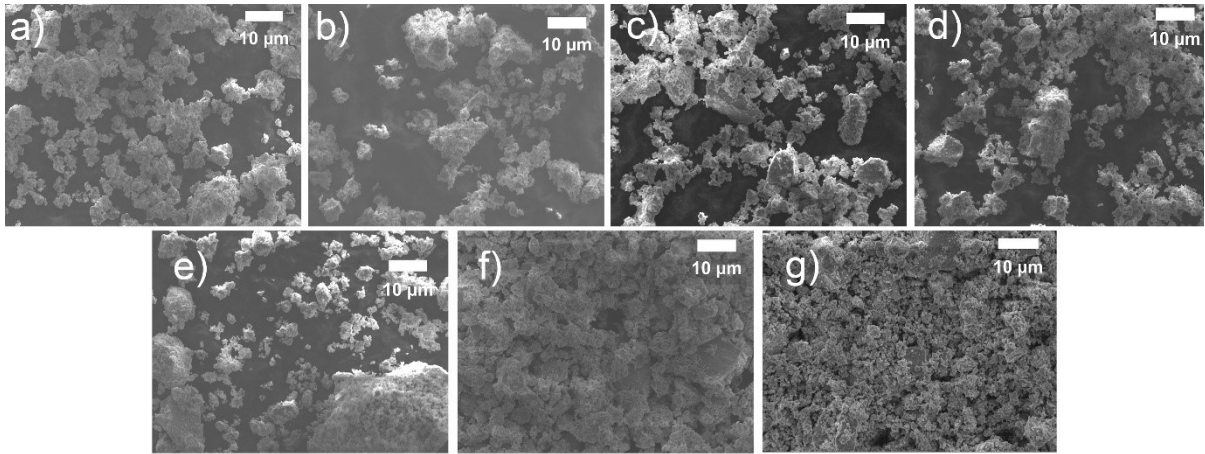

**Fig. S4.** SEM of as-prepared powders of: a) ST, b) GT, c) SSBT, d) SSGT, e) SSBT-Ge, f) SSBT-Zn, and g) SSBT-GeCu.

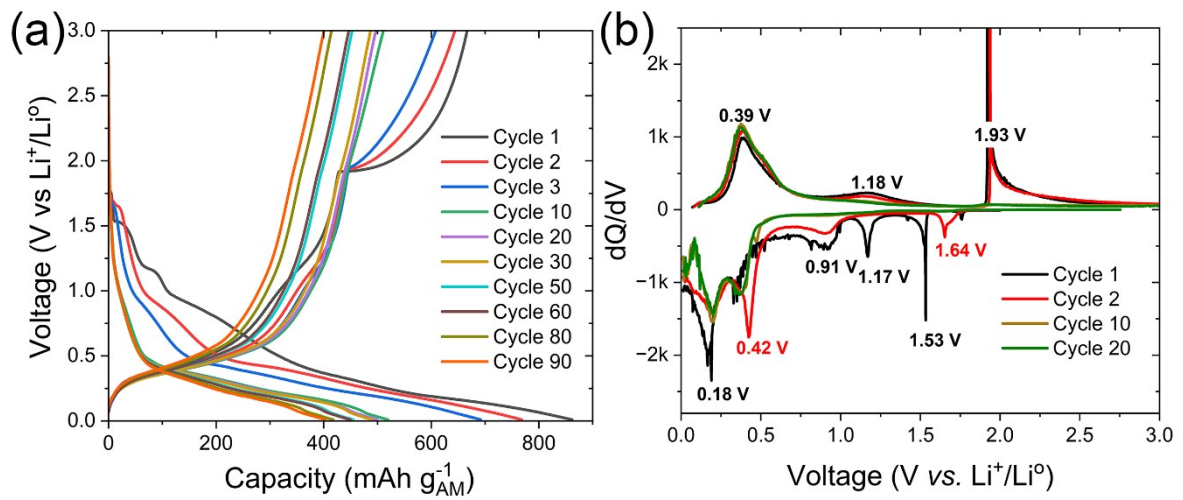

**Fig. S5.** a) charge-discharge curves and b)  $dQ/dV$  of GT in lithium half-cells.

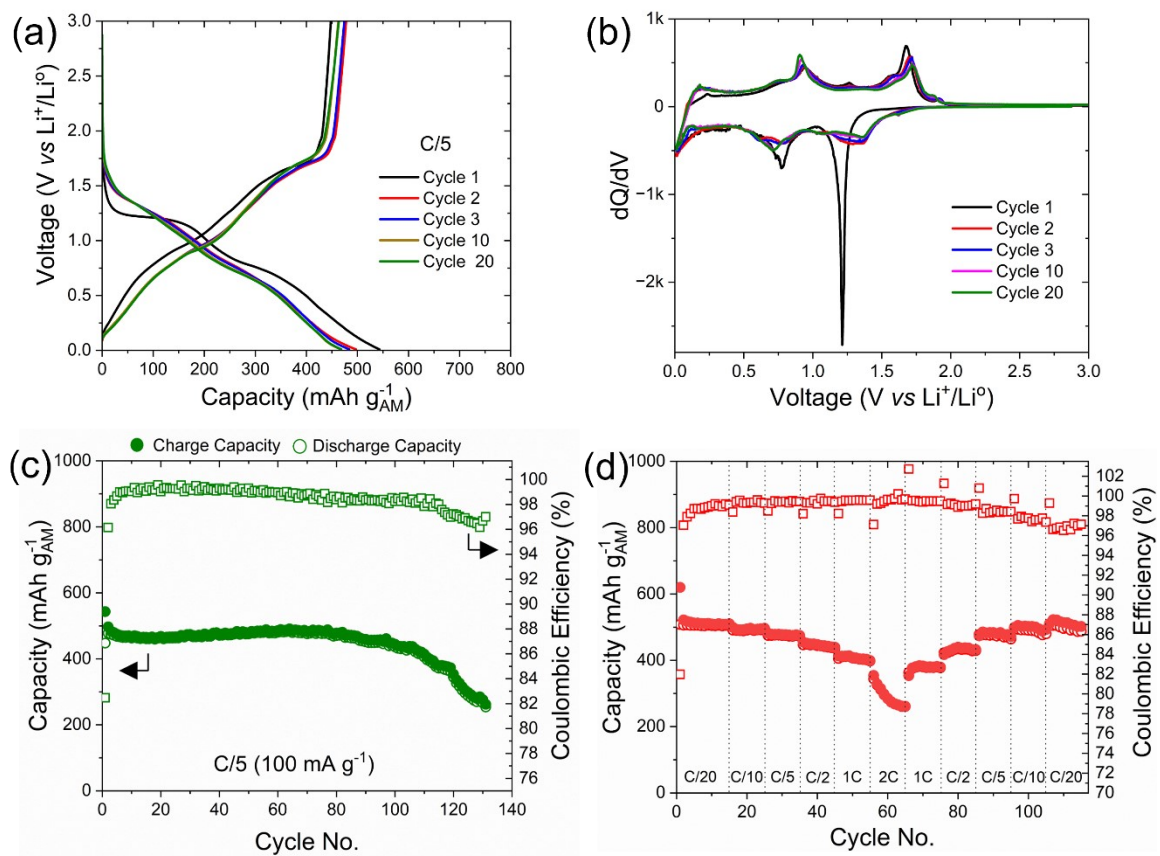

**Fig. S6.** a) charge-discharge curves, b)  $dQ/dV$ , c) galvanostatic cycling, and d) rate performance of SSBT-Zn.

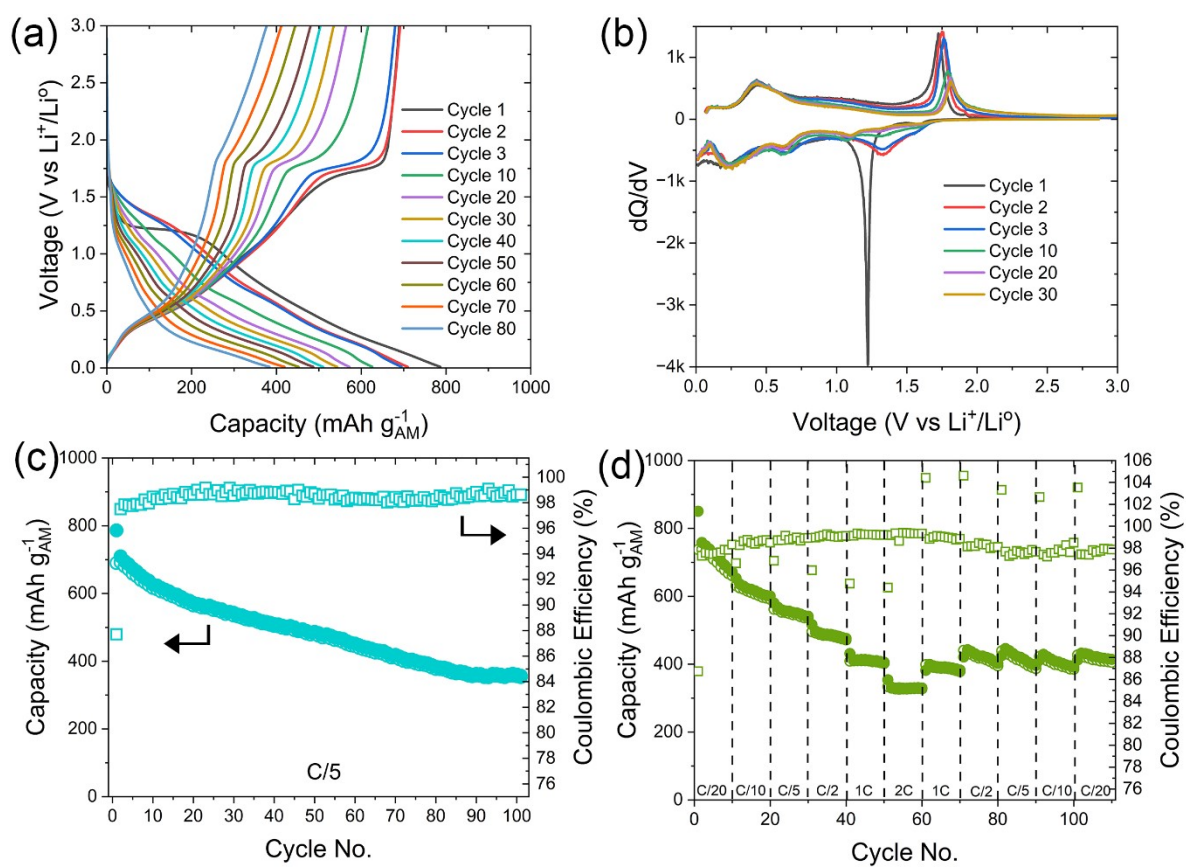

**Fig. S7.** a) charge-discharge curves, b)  $dQ/dV$ , c) galvanostatic cycling, and d) rate performance of SSGT in half-cells. (Symbols in (c) and (d): closed circle is discharge capacity, open circle is charge capacity, and open rectangle is CE)

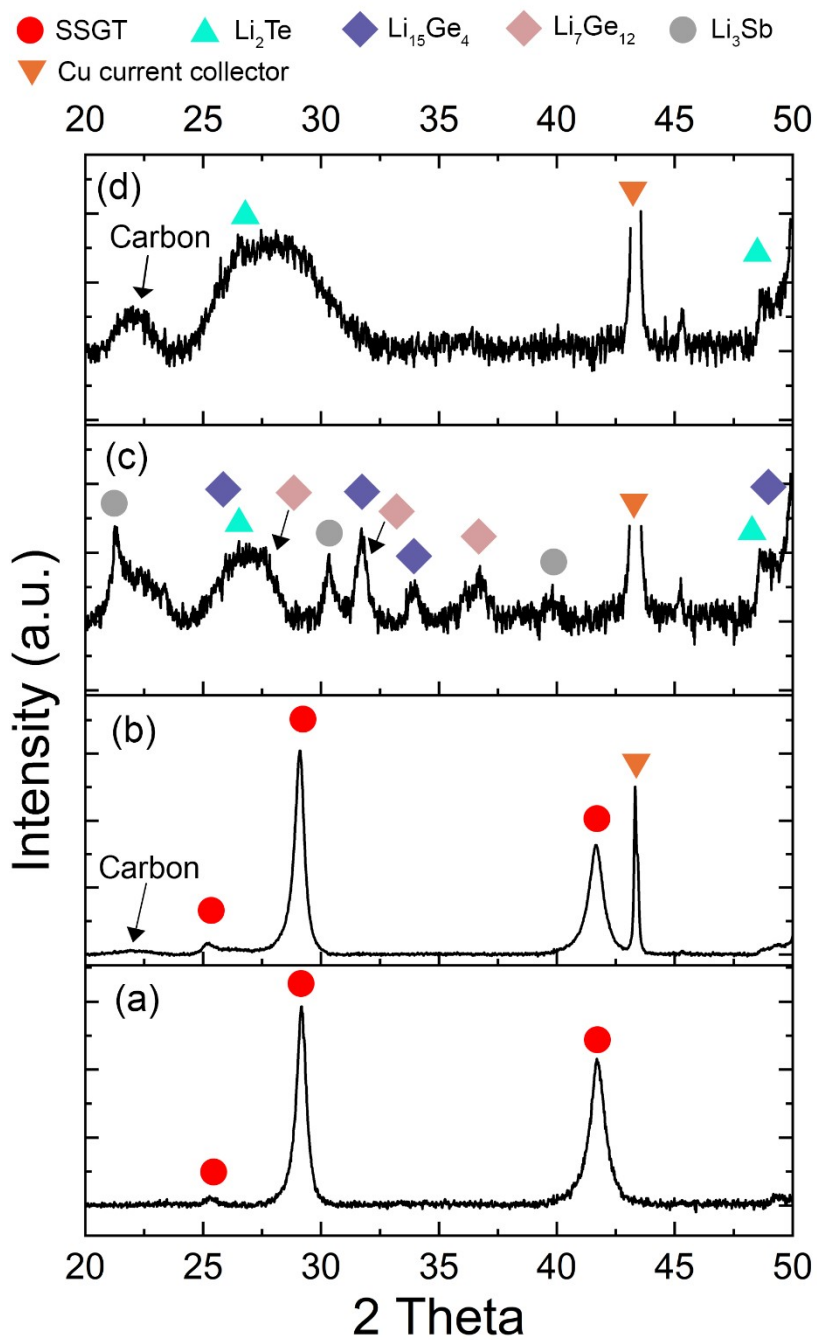

**Fig. S8.** XRD of a) as-synthesized powder, b) fresh electrode, c) fully lithiated electrode, and d) 1 cycled electrode of SSGT.

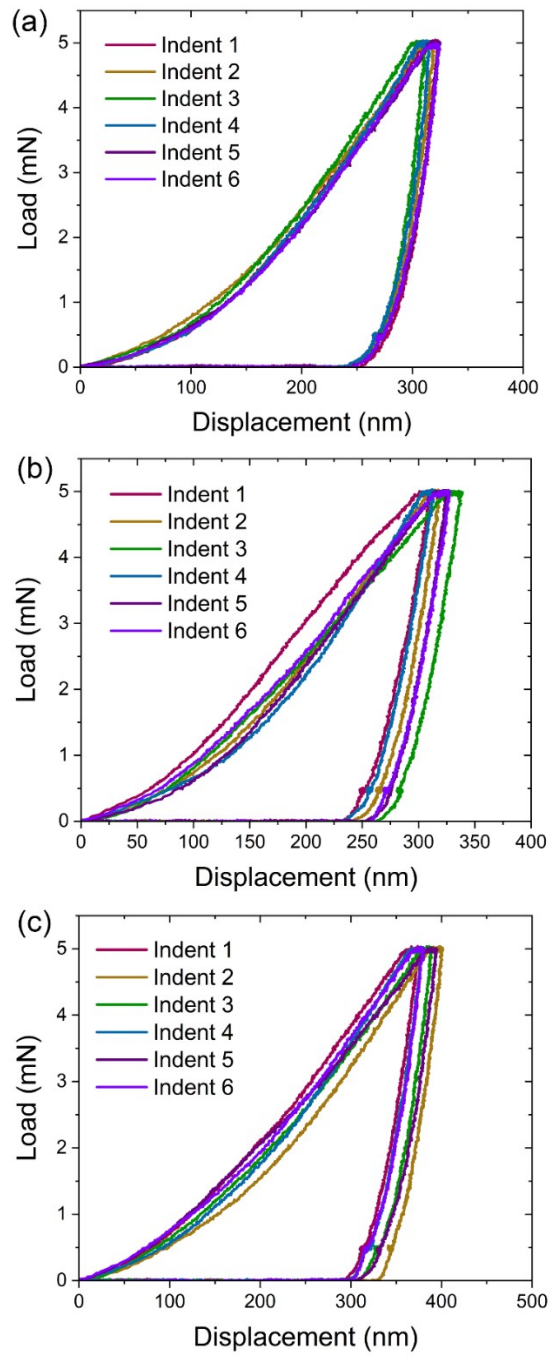

**Fig. S9.** Nanoindentation for sintered pellets of: a) ST, b) SSBT, and c) SSBT-Ge.

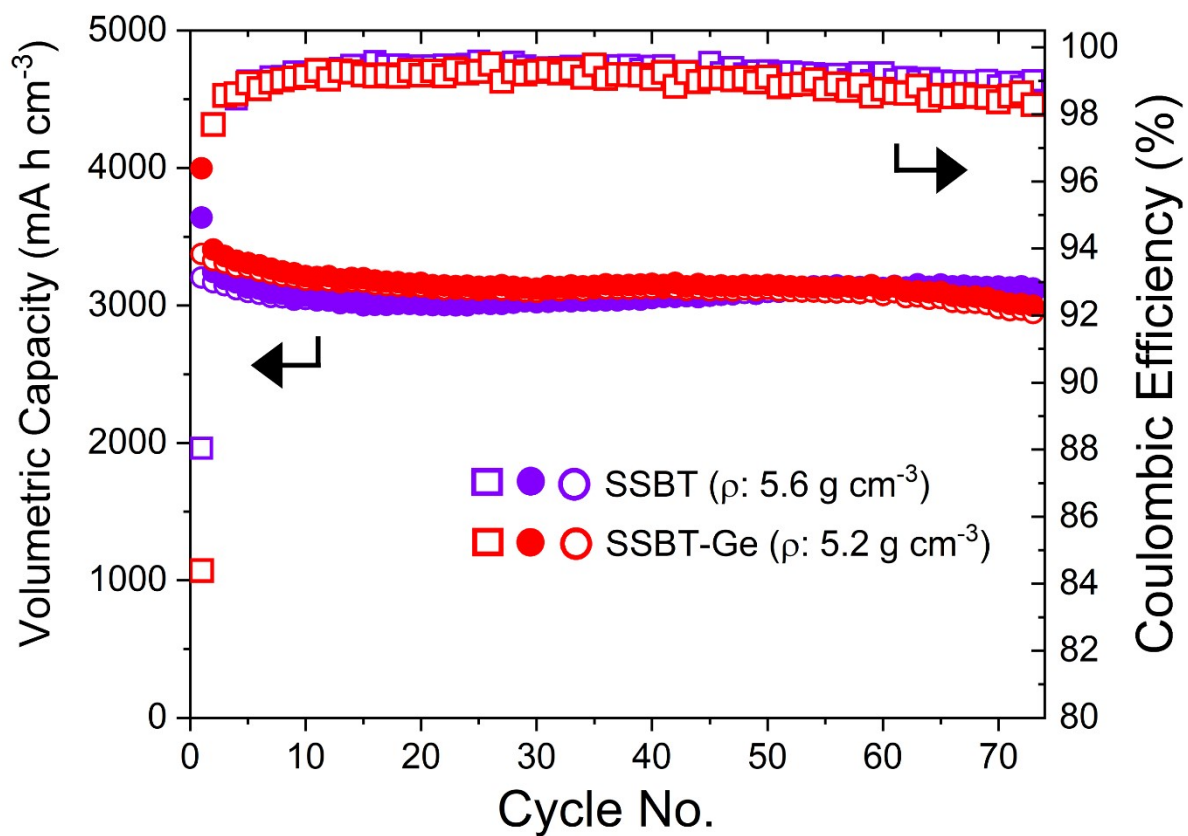

Fig. S10. Galvanostatic cycling of SSBT and SSBT-Ge.

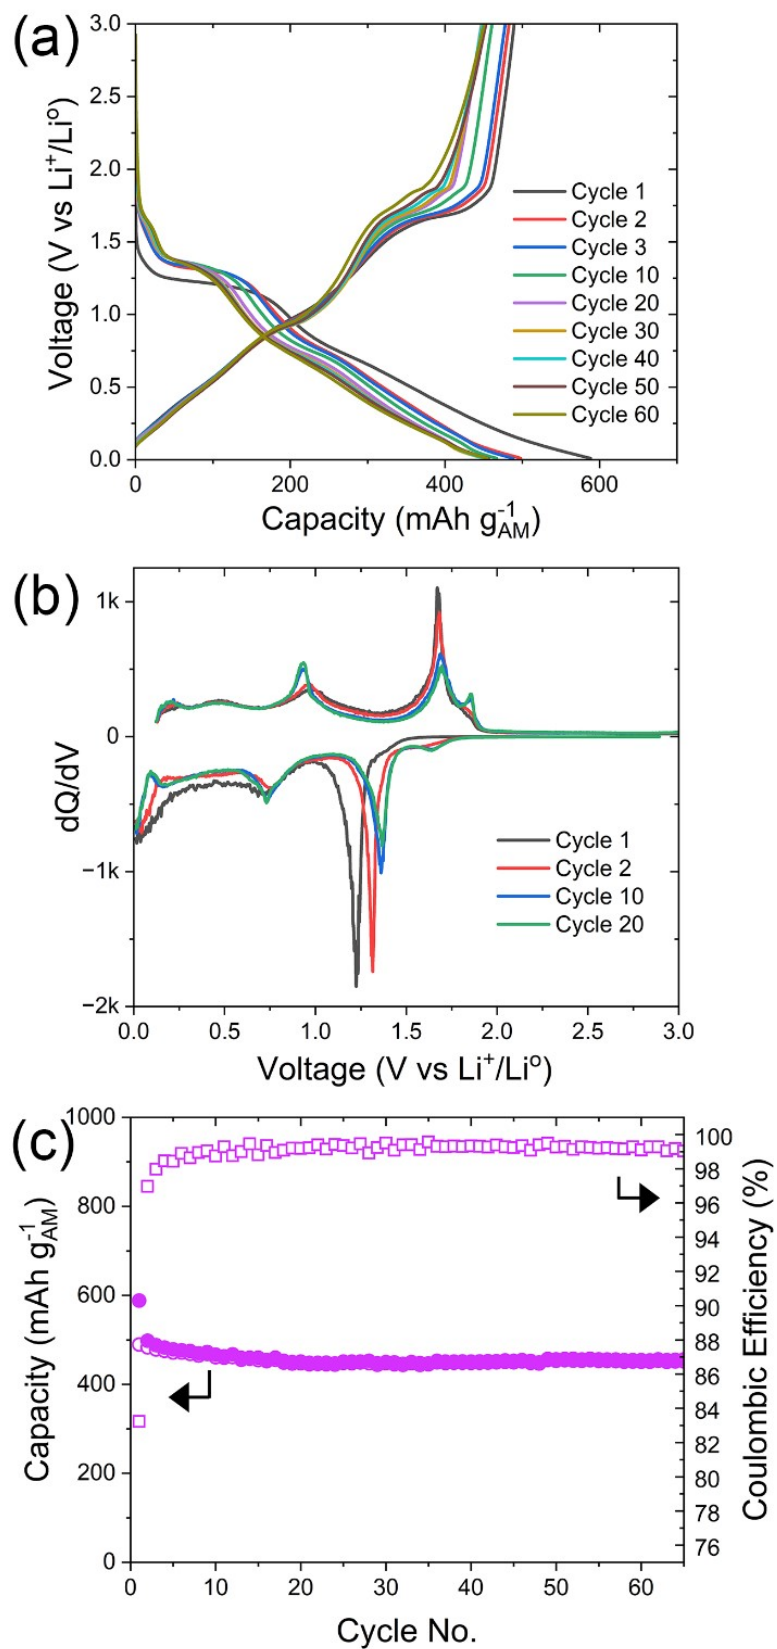

**Fig. S11.** a) charge-discharge curves, b)  $dQ/dV$ , and c) galvanostatic cycling of SSBT-GeCu with more lean electrolyte (30  $\mu\text{l}$ ) cells at C/5 rate.

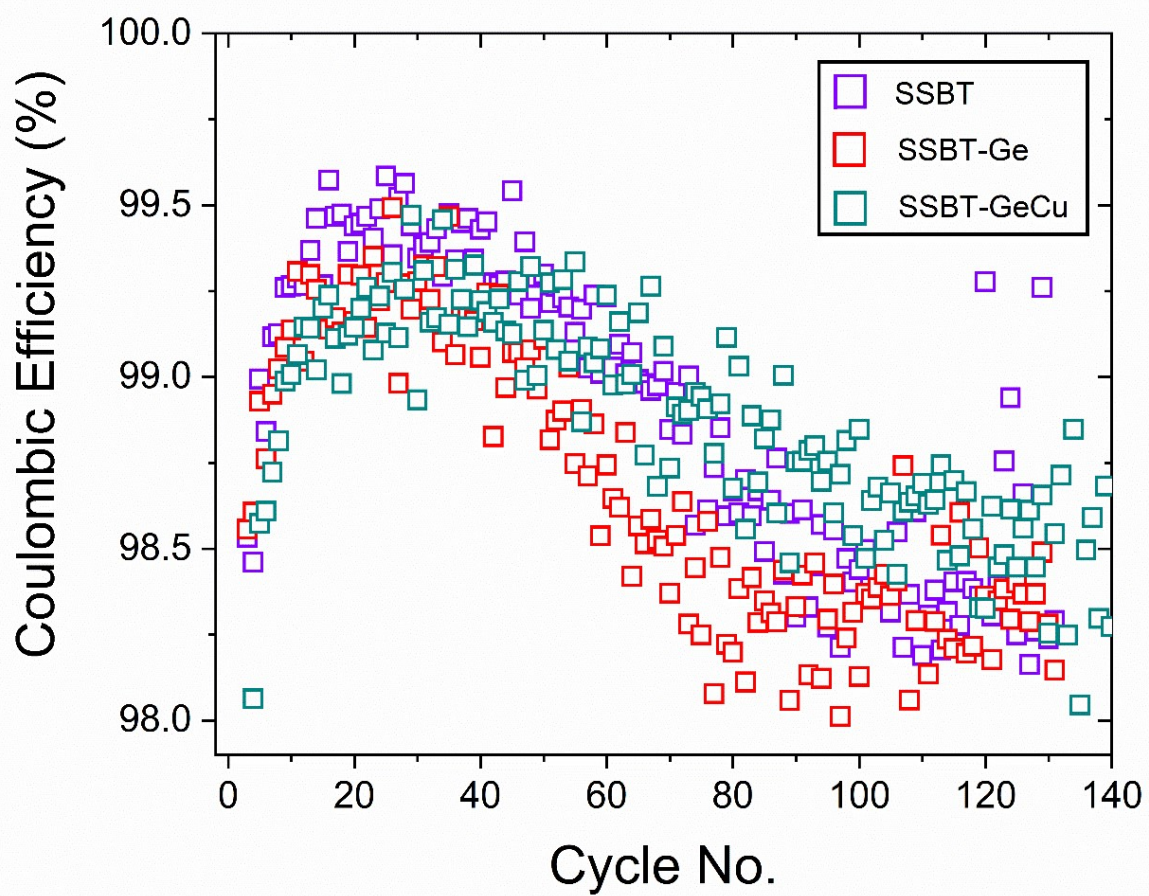

**Fig. S12.** Coulombic efficiency of SSBT, SSBT-Ge, and SSBT-GeCu for 140 cycles at C/5 in lithium half-cells

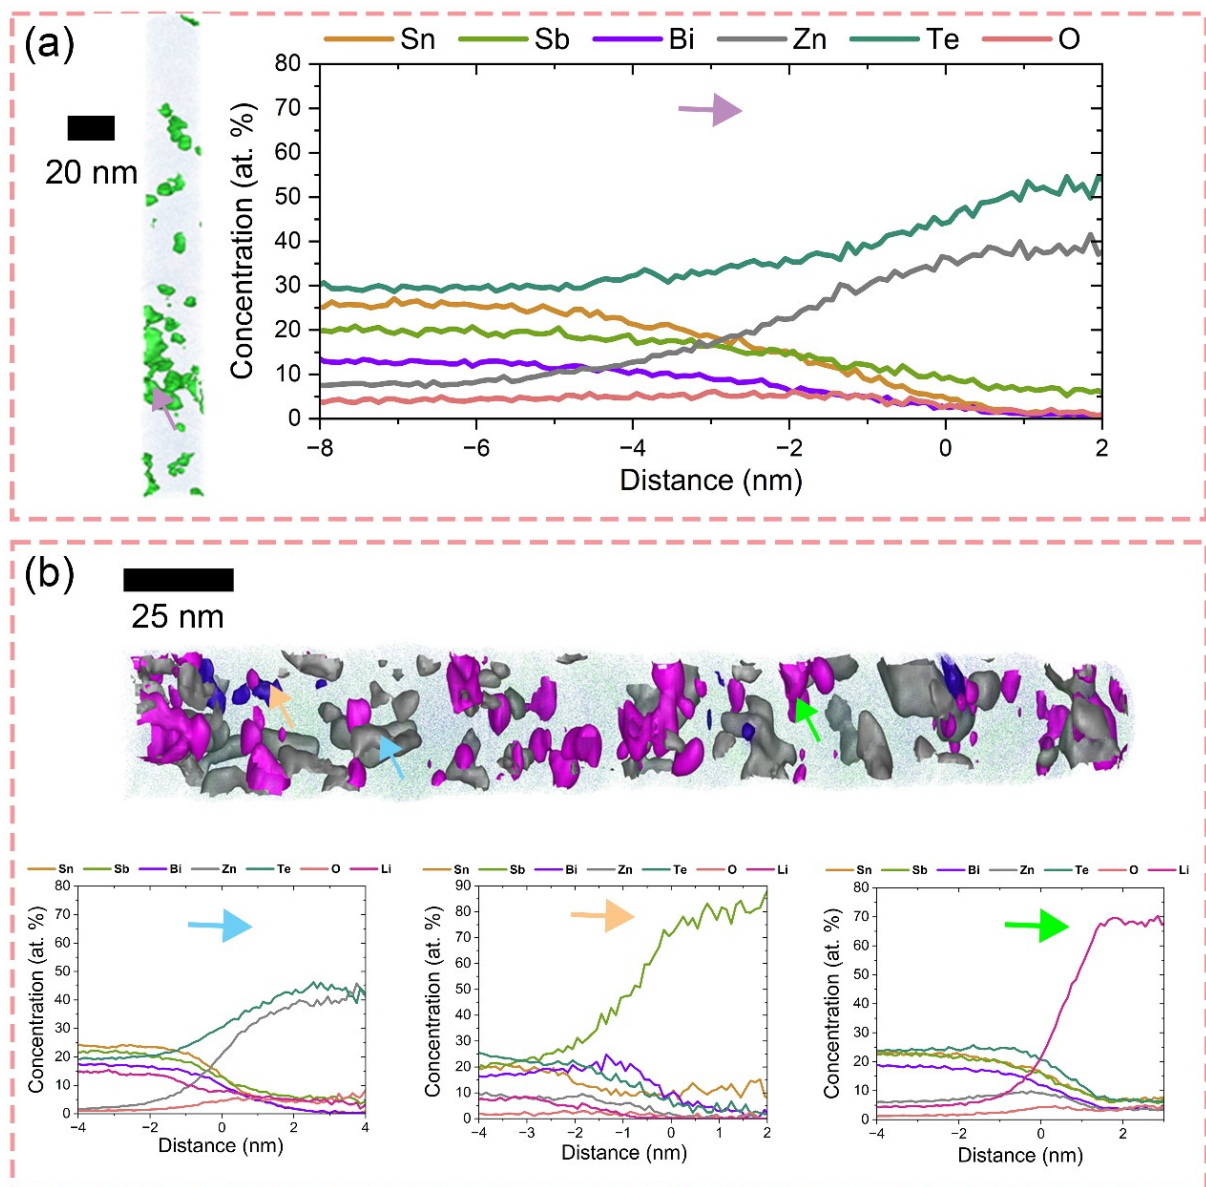

**Fig. S13.** APT of SSBT-Zn from: a) fresh electrode, and b) after 3 cycles.

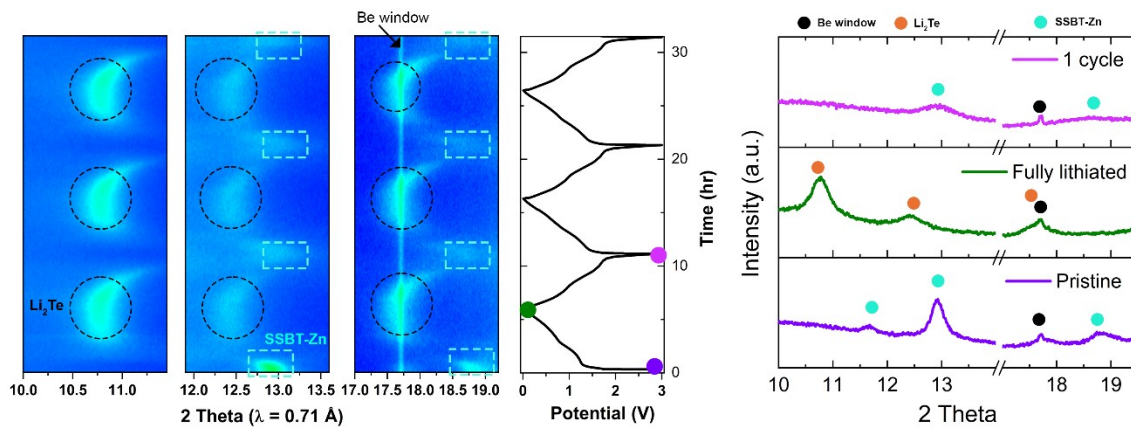

**Fig. S14.** Operando XRD of SSBT-Zn in lithium half-cell at C/5.
